Correction

# Correction: Impact of Different Oseltamivir Regimens on Treating Influenza A Virus Infection and Resistance Emergence: Insights from a Modelling Study

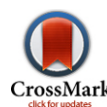

The *PLOS Computational Biology* Staff

There are two corrections to this manuscript:

The legend for Figure 2 is incorrect. The complete, correct legend for Figure 2 is:

**Figure 2. Average oseltamivir carboxylate kinetics (red line: 75 mg, blue line: 150 mg, green: 300 mg).** Panel A shows the pharmacokinetics for once a day intake for 10 days and the panel B twice-a-day intake for 5 days. The black line represents the  $EC_{50}^S$  for drug-sensitive virus and the dashed line the  $EC_{50}^R$  for resistant virus. The  $EC_{50}$ s were converted from  $\mu M$  to ng/mL for this figure.

The first sentence of the final paragraph of the Discussion section should have cited reference 48 instead of reference 55.

The correct sentence should read: In summary, we found that the recommended post-exposure prophylactic regimen should be used with caution, as it increases the risk of emerging resistance [48].

Reference 48: Fry AM, Goswami D, Nahar K, Sharmin AT, Rahman M, et al. (2014) Efficacy of oseltamivir treatment started within 5 days of symptom onset to reduce influenza illness duration and virus shedding in an urban setting in Bangladesh: a randomised placebo-controlled trial. *Lancet Infect Dis* 14: 109–118. doi: 10.1016/s1473-3099(13)70267-6

## Reference

1. Canini L, Conway JM, Perelson AS, Carrat F (2014) Impact of Different Oseltamivir Regimens on Treating Influenza A Virus Infection and Resistance Emergence: Insights from a Modelling Study. *PLoS Comput Biol* 10(4): e1003568. doi:10.1371/journal.pcbi.1003568

**Citation:** The *PLOS Computational Biology* Staff (2014) Correction: Impact of Different Oseltamivir Regimens on Treating Influenza A Virus Infection and Resistance Emergence: Insights from a Modelling Study. *PLoS Comput Biol* 10(6): e1003699. doi:10.1371/journal.pcbi.1003699

**Published:** June 3, 2014

**Copyright:** © 2014 The *PLOS Computational Biology* Staff. This is an open-access article distributed under the terms of the Creative Commons Attribution License, which permits unrestricted use, distribution, and reproduction in any medium, provided the original author and source are credited.
